# Supplementary material for: Towards formation of fibrous woven memory devices from all-carbon electronic fibers
Source: Royal Society of Chemistry journal article supplement (doi:10.1039/c5cp00256g), 2015-01-01
Supplement: c5cp00256g1.pdf [file c5cp00256g1.pdf]

Supporting information for

## Towards Fibrous Woven Memory from All-Carbon Electronic Fibers

Ru Li,<sup>a,b</sup> Rui Sun,<sup>a</sup> Yanyan Sun,<sup>a</sup> Peng Gao,<sup>a</sup> Yongyizhang,<sup>a</sup> Zhongming Zeng<sup>a</sup> and Qingwen Li<sup>a\*</sup>

<sup>a</sup> Key Lab of Nanodevices and Applications, Suzhou Institute of Nano-Tech and Nano-Bionics, Chinese Academy of Sciences (CAS), Ruoshui Road 398, Suzhou, 215123, China,

<sup>b</sup> University of Chinese Academy of Science, Yuquan Road 19, Beijing, 100049, China.

[qwli2007@sinano.ac.cn](mailto:qwli2007@sinano.ac.cn).

### 1: Characterization of the spinnable DWNT array

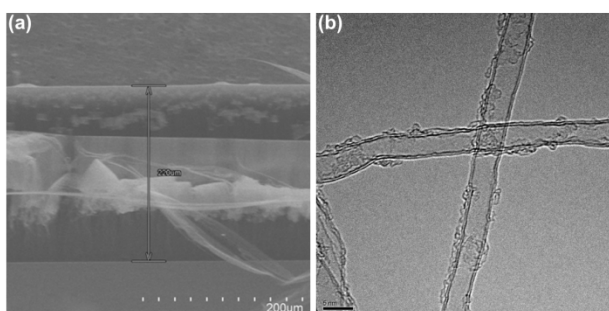

Figure S1. (a) SEM image of spinnable DWNT array. (b) TEM image of the DWNTs from the spinnable DWNT array.

### 2: SEM image of the highly packed DWNT fiber

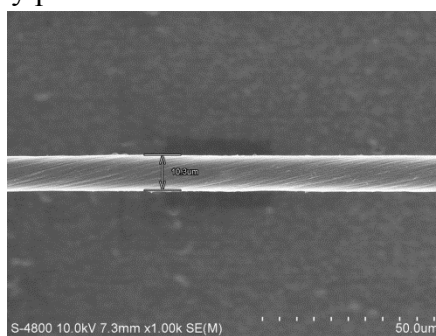

Figure S2. SEM image of the DWNT fiber spin-twisted from the spinnable DWNT array.

### 3: SEM image of GO on DWNT fiber under bending test

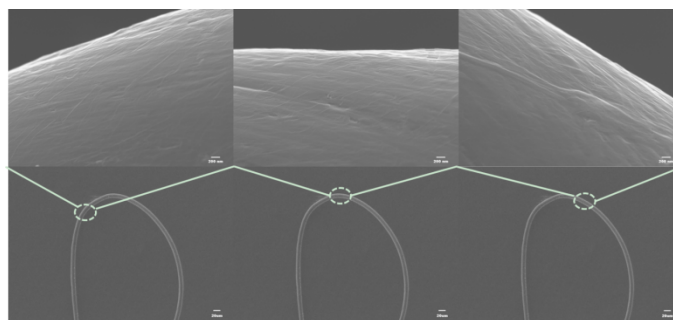

Figure S3. SEM image of the GO on DWNT fiber under bending test.
